# Supplementary material
Source: PubMed Central journal article supplement (PMC6279489)

# Figure S1

**A**

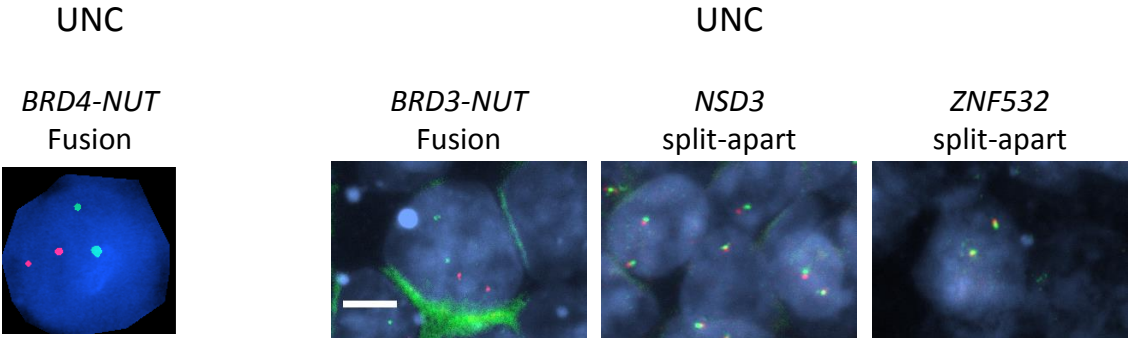

**B**

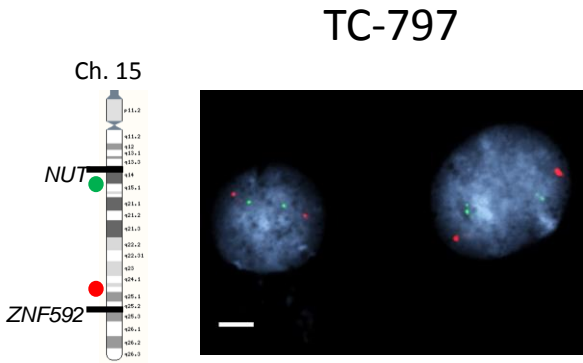

**C**

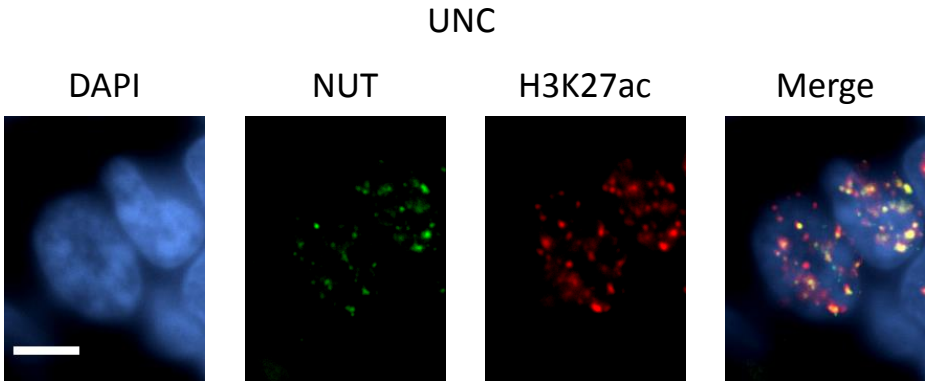

# Figure S2

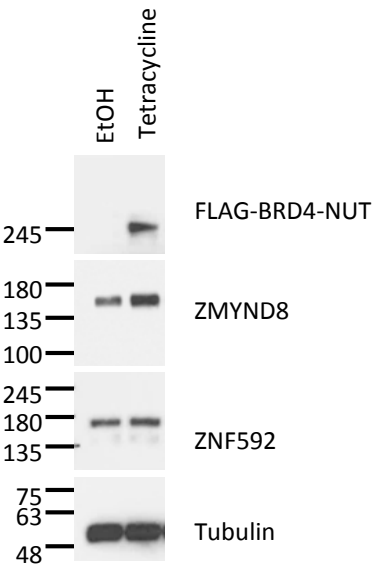

# Figure S3

**A**

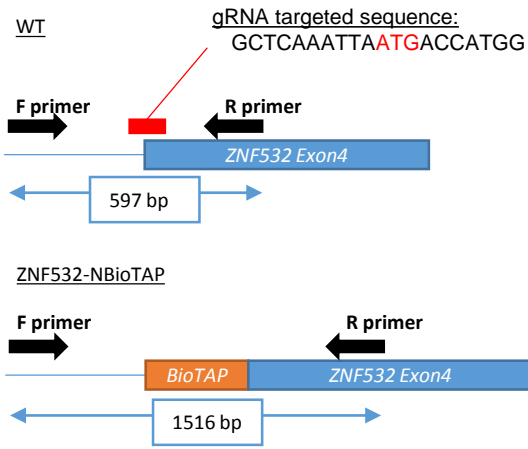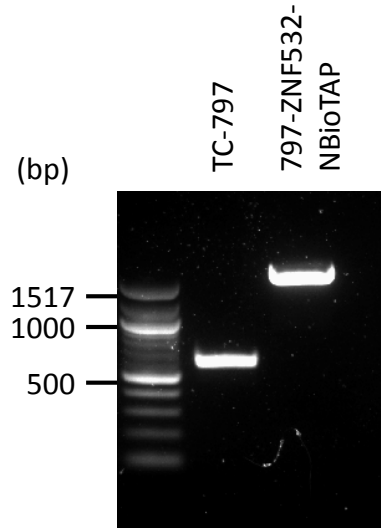

**B**

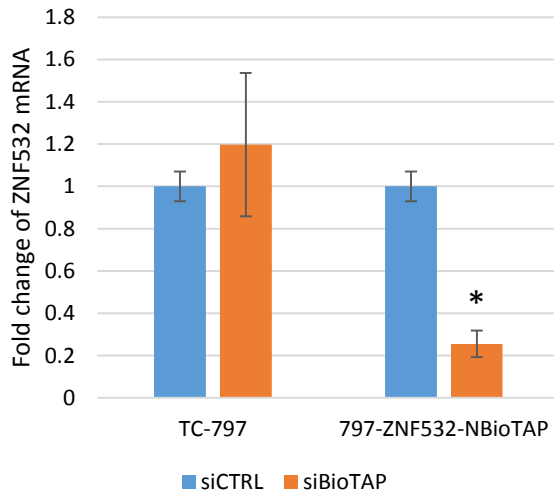

Supplement: NIHMS1504329-supplement-2.pdf [file NIHMS1504329-supplement-2.pdf]
